# Supplementary material for: Polymorphisms in MicroRNA Binding Sites Predict Colorectal Cancer Survival
Source: PubMed Central journal article supplement — Int J Med Sci. 2017 Jan 1;14(1):53–7. doi: 10.7150/ijms.17027 (PMC5278659; doi:10.7150/ijms.17027), 2017-01-01
Supplement: ijmsv14p0053s1.pdf [file ijmsv14p0053s1.pdf]

**Table S1.** Genotyped miRNA target site SNPs and the *P* values of their association with overall survival

| SNP ID     | Gene           | Chromosome | Position  | Allele | MAF    |                | <i>P</i> * |
|------------|----------------|------------|-----------|--------|--------|----------------|------------|
|            |                |            |           |        | Hapmap | CHB This study |            |
| rs5876     | <i>HIAT1</i>   | chr1       | 100320581 | C>T    | 0.34   | 0.45           | 0.199      |
| rs10510454 | <i>DAZL</i>    | chr3       | 16604608  | C>T    | 0.47   | 0.54           | 0.109      |
| rs1128154  | <i>HCLSI</i>   | chr3       | 122833305 | G>T    | 0.32   | 0.28           | 0.654      |
| rs1058267  | <i>PCDH10</i>  | chr4       | 134332051 | A>G    | 0.48   | 0.52           | 0.174      |
| rs2292899  | <i>ACSL1</i>   | chr4       | 185915103 | G>A    | 0.40   | 0.32           | 0.580      |
| rs8488     | <i>HISPPD1</i> | chr5       | 102566650 | T>C    | 0.41   | 0.49           | 1.000      |
| rs998754   | <i>GABRA1</i>  | chr5       | 161258511 | A>C    | 0.44   | 0.46           | 0.134      |
| rs4351800  | <i>SYT9</i>    | chr11      | 7446394   | A>C    | 0.37   | 0.38           | 0.109      |
| rs1062836  | <i>NECAP1</i>  | chr12      | 8140316   | C>G    | 0.41   | 0.44           | 0.570      |
| rs4298982  | <i>LARP4</i>   | chr12      | 49156695  | A>C    | 0.48   | 0.52           | 0.713      |
| rs2466551  | <i>NFYB</i>    | chr12      | 103037047 | T>G    | 0.38   | 0.42           | 0.549      |
| rs7158951  | <i>POMT2</i>   | chr14      | 76812334  | C>T    | 0.50   | 0.44           | 0.458      |
| rs11704    | <i>ZNF839</i>  | chr14      | 101878407 | G>C    | 0.47   | 0.50           | 0.218      |
| rs3210967  | <i>ZDHHC7</i>  | chr16      | 83566963  | C>T    | 0.46   | 0.57           | 0.264      |
| rs1051424  | <i>RPS6KB1</i> | chr17      | 55379105  | A>G    | 0.36   | 0.40           | 0.075      |
| rs2073859  | <i>LIMK2</i>   | chr22      | 30004552  | G>A    | 0.40   | 0.31           | 0.576      |

Abbreviations: SNP, single nucleotide polymorphism; MAF, minor allele frequency.

\*Log-rank test for trend.
